# Supplementary material for: Monitoring Natural SARS-CoV-2 Infection in Lions (Panthera leo) at the Barcelona Zoo: Viral Dynamics and Host Responses
Source: MDPI journal article supplement (doi:10.3390/v13091683), 2021-08-25
Supplement: s1 [file s1]

**Table S1.** Number and type of specimens chronologically collected for virology analyses after lions displayed respiratory clinical signs. L1, Lion1; L2, Lion2; L3, Lion3; L4, Lion4.

| Date of collection | Nasal Swab  |    |    |    | Saliva  |    |    |    | Feces  |    |    |    | Group |
|--------------------|----------------------------------------------------------------------------------------------|----|----|----|------------------------------------------------------------------------------------------|----|----|----|-------------------------------------------------------------------------------------------|----|----|----|-------|
|                    | L1                                                                                           | L2 | L3 | L4 | L1                                                                                       | L2 | L3 | L4 | L1                                                                                        | L2 | L3 | L4 |       |
| 09-nov             | 1                                                                                            | 1  | 1  | 1  |                                                                                          |    |    |    | 1                                                                                         |    |    |    | 2     |
| 10-nov             | 1                                                                                            | 1  | 2  | 1  |                                                                                          |    |    |    |                                                                                           |    |    |    |       |
| 11-nov             | 1                                                                                            | 1  | 1  | 2  |                                                                                          |    |    |    |                                                                                           |    |    |    | 3     |
| 12-nov             |                                                                                              |    |    |    |                                                                                          |    |    |    |                                                                                           |    |    |    | 2     |
| 13-nov             |                                                                                              |    |    |    | 1                                                                                        | 1  |    | 1  |                                                                                           |    |    |    | 5     |
| 14-nov             | 1                                                                                            | 1  | 1  | 1  |                                                                                          |    |    |    |                                                                                           |    |    |    | 2     |
| 15-nov             |                                                                                              | 1  | 1  | 1  |                                                                                          |    |    |    |                                                                                           |    |    |    | 6     |
| 16-nov             |                                                                                              | 1  | 1  |    |                                                                                          |    | 1  |    |                                                                                           |    |    |    | 1     |
| 17-nov             |                                                                                              |    |    | 1  |                                                                                          |    |    |    | 1                                                                                         |    |    |    | 1     |
| 18-nov             |                                                                                              |    |    |    |                                                                                          |    |    |    |                                                                                           |    | 1  | 1  | 5     |
| 19-nov             | 1                                                                                            |    |    |    |                                                                                          |    |    |    |                                                                                           |    |    |    |       |
| 20-nov             | 1                                                                                            | 1  | 1  | 1  |                                                                                          |    |    |    |                                                                                           | 1  |    |    |       |
| 21-nov             |                                                                                              | 1  | 1  | 1  |                                                                                          |    |    |    |                                                                                           |    |    |    | 2     |
| 22-nov             |                                                                                              |    |    |    |                                                                                          |    |    |    |                                                                                           |    |    |    | 1     |
| 23-nov             | 1                                                                                            | 1  | 1  | 1  |                                                                                          |    |    |    |                                                                                           |    |    |    | 5     |
| 24-nov             |                                                                                              |    |    |    |                                                                                          |    |    |    |                                                                                           |    |    |    | 5     |
| 25-nov             | 1                                                                                            | 1  | 1  |    |                                                                                          |    |    |    |                                                                                           |    |    |    | 5     |
| 26-nov             |                                                                                              |    |    | 1  |                                                                                          |    |    |    |                                                                                           |    |    |    | 3     |
| 27-nov             | 1                                                                                            |    | 1  | 1  |                                                                                          |    |    |    |                                                                                           |    |    |    | 3     |
| 28-nov             |                                                                                              | 1  |    |    |                                                                                          |    |    |    |                                                                                           |    |    |    | 4     |
| 29-nov             |                                                                                              |    |    |    |                                                                                          |    |    |    |                                                                                           |    |    |    | 2     |
| 30-nov             | 1                                                                                            | 1  | 1  | 1  |                                                                                          |    |    |    |                                                                                           |    |    |    | 3     |
| 01-dic             |                                                                                              |    |    |    |                                                                                          |    |    |    |                                                                                           |    |    |    | 4     |
| 02-dic             |                                                                                              | 1  | 1  |    |                                                                                          |    |    |    |                                                                                           |    |    |    | 1     |

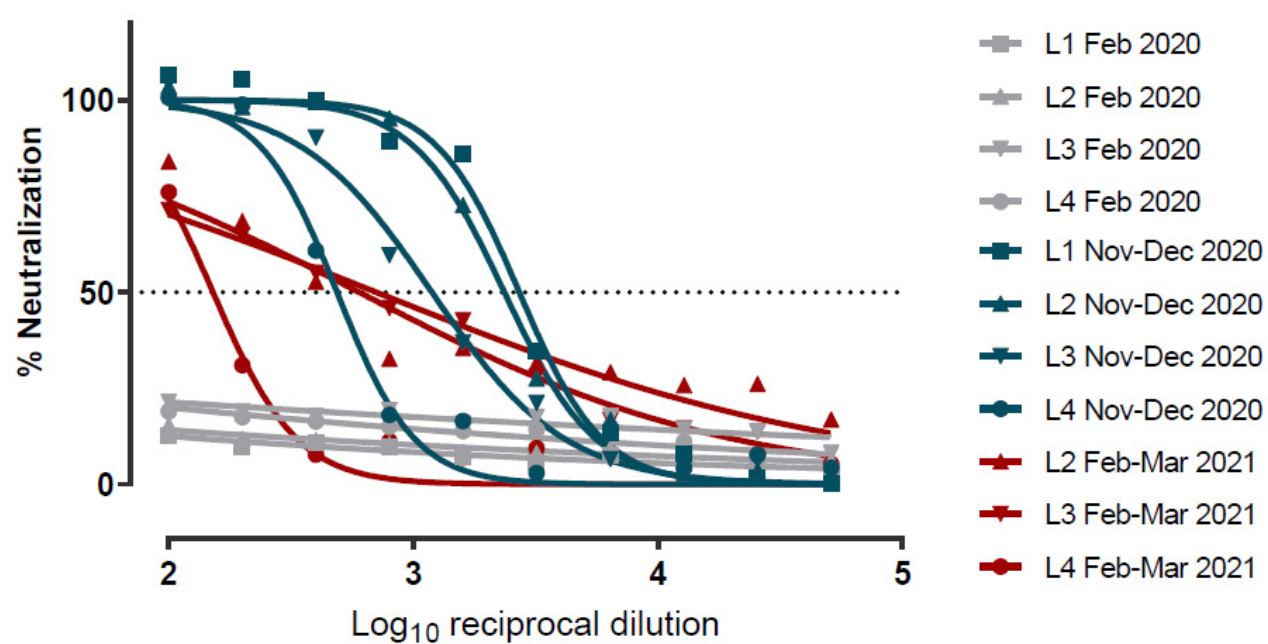

log(inhibitor) vs. normalized response -- Variable slope

**Figure S1.** Seroneutralization curves adjusted to a non-linear fit regression model and SNT50 titers.
